# Supplementary material for: Treatment of Methicillin-Resistant Staphylococcus aureus (MRSA) Pneumonia with Ceftaroline Fosamil in a Patient with Inhalational Thermal Injury
Source: PubMed Central journal article supplement — Infect Dis Ther. 2015 Nov 5;4(4):519–28. doi: 10.1007/s40121-015-0096-4 (PMC4675765; doi:10.1007/s40121-015-0096-4), 2015-11-05
Supplement: 40121_2015_96_MOESM1_ESM.pdf [file 40121_2015_96_MOESM1_ESM.pdf]

- Methicillin-resistant *Staphylococcus aureus* (MRSA) pneumonia is associated with high morbidity and mortality.
- We evaluated the use of ceftaroline fosamil in a 48-year old burn patient with inhalation thermal injury and MRSA pneumonia who had not responded to initial treatment with vancomycin (mean inhibitory concentration = 2 mg/L) and for whom linezolid was not appropriate due to the potential of drug-drug interactions.
- Due to the potential for rapid ceftaroline clearance, ceftaroline was administered as 600 mg intravenous every 8 hours with a 2-hour prolonged infusion and pharmacokinetic samples were evaluated via bioassay.
- The patient responded rapidly and ceftaroline was continued for a total of 14 days.
- To our knowledge, this is the first case report of the use of ceftaroline fosamil in a burn patient with MRSA pneumonia.

This summary slide represents the opinions of the authors. No funding or sponsorship was received for publication of this work. For a full list of acknowledgments and disclosures for all authors of this article, please see the full text online. © The Author(s) 2015. Creative Commons Attribution Noncommercial License (CC BY-NC).
